# Supplementary material
Source: PubMed Central journal article supplement (PMC4846884)
Supplement: ajtr0008-0298-f8.pdf [file ajtr0008-0298-f8.pdf]

*Ulmus davidiana* extract has osteogenic effect in vertebra

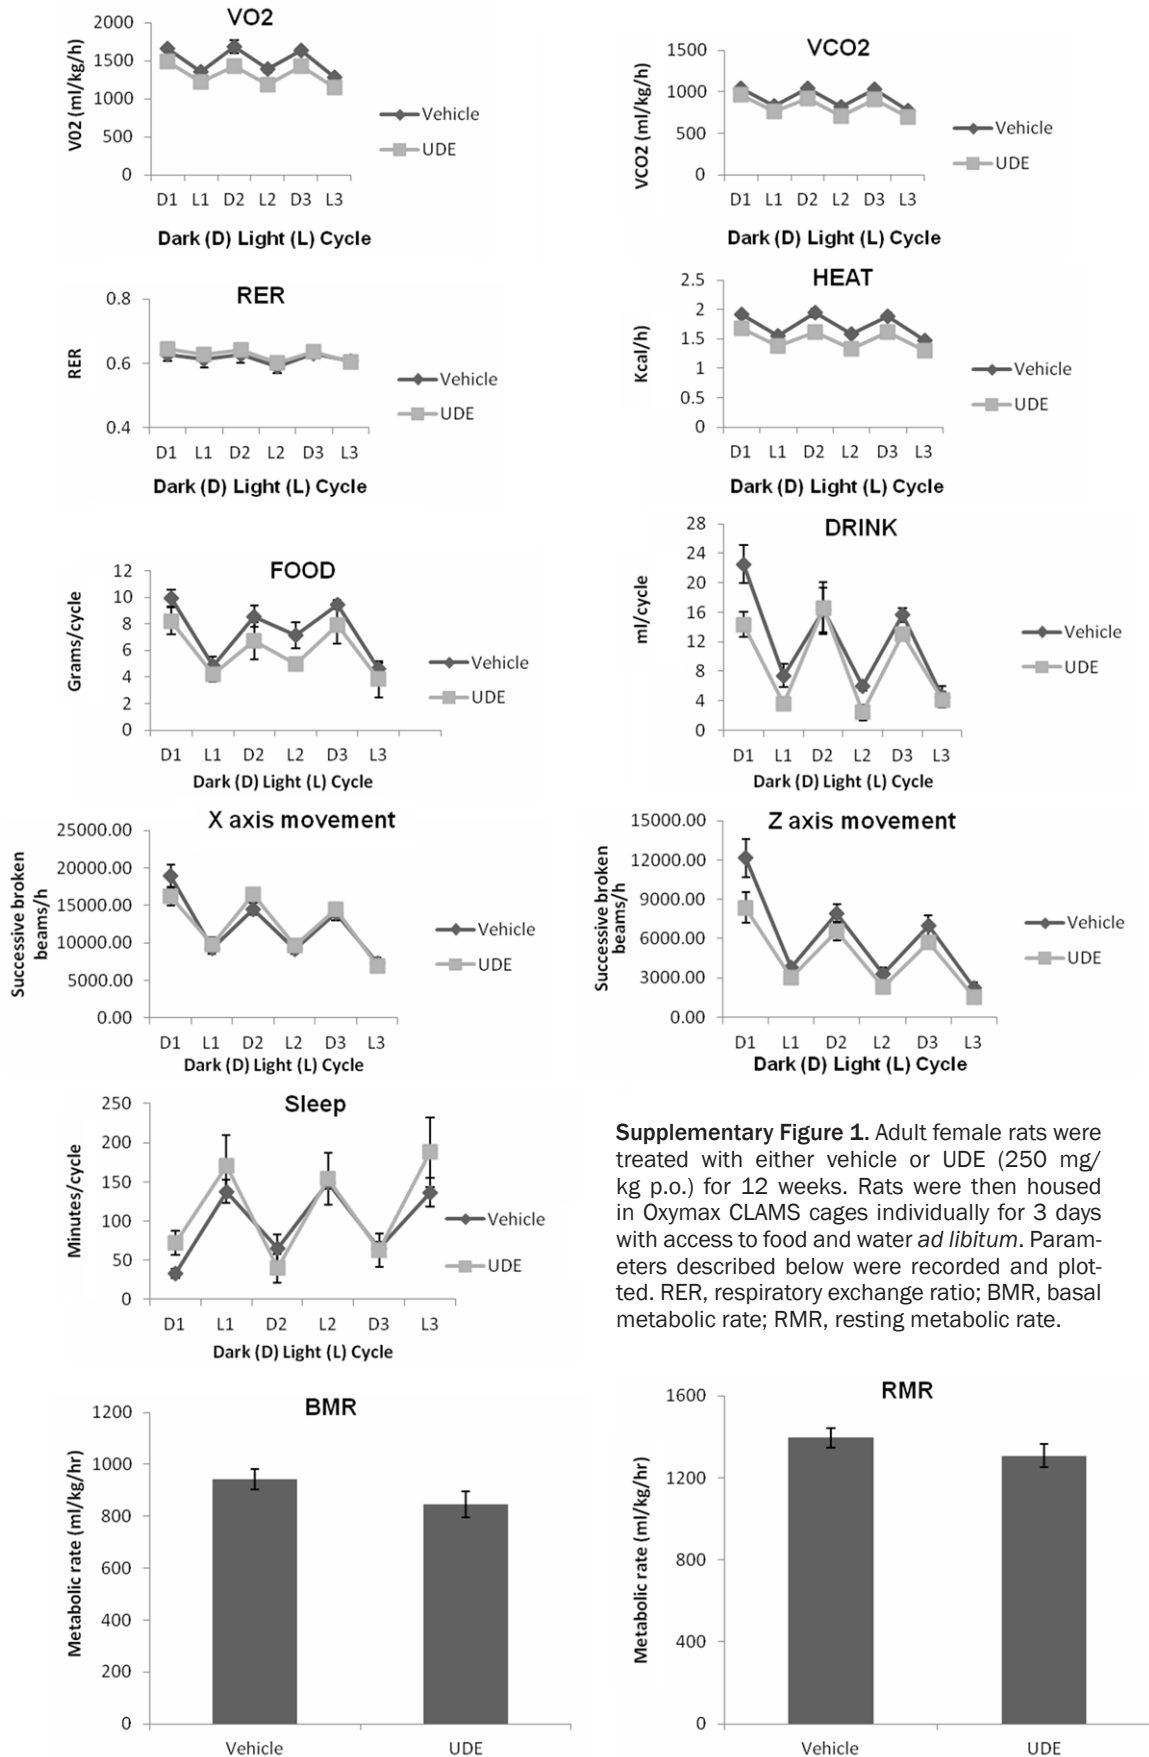

**Supplementary Figure 1.** Adult female rats were treated with either vehicle or UDE (250 mg/kg p.o.) for 12 weeks. Rats were then housed in Oxymax CLAMS cages individually for 3 days with access to food and water *ad libitum*. Parameters described below were recorded and plotted. RER, respiratory exchange ratio; BMR, basal metabolic rate; RMR, resting metabolic rate.

*Ulmus davidiana* extract has osteogenic effect in vertebra

**Supplementary Table 1.** Change in body weight in various groups

|                          | Sham+V      | OVX+V             | OVX+UDE          | OVX+E2       |
|--------------------------|-------------|-------------------|------------------|--------------|
| Body wt. gain (% change) | 100 ± 7.185 | 154.42 ± 5.342*** | 147.57 ± 6.28*** | 93.36 ± 4.82 |

Values represent mean ± SEM (n = 16 rats/group). \*\*\*P<0.001 compared to sham+V (control).
